# Supplementary material for: Early-to-mid Miocene erosion rates inferred from pre-Dead Sea rift Hazeva River fluvial chert pebbles using cosmogenic 21 Ne
Source: Copernicus journal article supplement (doi:10.5194/esurf-8-289-2020), 2020-04-27
Supplement: Supplementary file 1 [file esurf-8-289-2020-supplement.zip]

Archive with 2 entries (2 files):
- esurf-8-289-2020-supplement-title-page.pdf
- Supplement.docx
