# Supplementary material for: Early-to-mid Miocene erosion rates inferred from pre-Dead Sea rift Hazeva River fluvial chert pebbles using cosmogenic 21 Ne
Source: Copernicus journal article supplement (doi:10.5194/esurf-8-289-2020), 2020-04-27
Supplement: Supplementary file 1 [file esurf-8-289-2020-supplement.zip › esurf-8-289-2020-supplement-title-page.pdf]

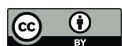

*Supplement of*

**Early-to-mid Miocene erosion rates inferred  
from pre-Dead Sea rift Hazeva River fluvial  
chert pebbles using cosmogenic  $^{21}\text{Ne}$**

**Michal Ben-Israel et al.**

*Correspondence to:* Michal Ben-Israel ([michal.benisrael@mail.huji.ac.il](mailto:michal.benisrael@mail.huji.ac.il))

- [esurf-8-289-2020-supplement-title-page.pdf](#)
- [Supplement.docx](#)

The copyright of individual parts of the supplement might differ from the CC BY 4.0 License.
